# Supplementary material
Source: PubMed Central journal article supplement (PMC3838192)
Supplement: MCB.00480-13_zmb999100190so1.pdf [file MCB.00480-13_zmb999100190so1.pdf]

1 **Supplemental Materials**

2 **Extended Materials and Methods**

3 **Tables 1-4: Lists of antibodies and nucleic acid sequences.**

| <b>Table 1: Antibodies and Applications</b> |                     |                |            |
|---------------------------------------------|---------------------|----------------|------------|
| <b>Antibody</b>                             | <b>Manufacturer</b> | <b>Catalog</b> | <b>Use</b> |
| <i>Primary:</i>                             |                     |                |            |
| $\beta$ -tubulin                            | Sigma               | T8328          | WB         |
| CHIP                                        | Abcam               | Ab134064       | WB         |
| CHIP                                        | Cell Signaling      | 2080S          | WB         |
| CHIP                                        | Sigma               | S1073          | WB, IP     |
| FLAG                                        | Sigma               | F3165          | WB         |
| FLAG                                        | Sigma               | F7425          | WB         |
| GAPDH                                       | Sigma               | G8795          | WB         |
| $\gamma$ H2AX                               | Millipore           | 05-636         | IF         |
| H3                                          | Cell Signaling      | 9715S          | WB         |
| H3K9Ac                                      | Cell Signaling      | 9671S          | WB         |
| H3K9Ac                                      | Sigma               | H9286          | WB, ChIP   |
| HA-HRP                                      | Roche               | 3F10           | WB         |
| Myc                                         | Santa Cruz          | SC-40          | WB         |
| Rabbit IgG                                  | Sigma               | I5009          | ChIP       |
| P27                                         | Abcam               | Ab32034        | WB         |
| pRPA32 S4/S8                                | Bethyl              | A300-245A      | WB         |
| RPA32                                       | Calbiochem          | NA19L          | WB         |
| SirT6                                       | Cell Signaling      | 2590S          | WB         |
| SirT6                                       | Abcam               | Ab62739        | WB         |
| SirT6                                       | Sigma               | S4322          | WB, ChIP   |
| <i>Secondary:</i>                           |                     |                |            |
| Goat anti-mouse 488                         | Molecular Probes    | 11001          | IF         |
| Goat IgG-HRP                                | Sigma               | S5420          | WB         |
| Mouse IgG-HRP                               | Sigma               | S9917          | WB         |
| Rabbit IgG-HRP                              | Sigma               | S9169          | WB         |
| Protein A-HRP                               | Millipore           | 18-160         | WB         |

4 List of antibodies, catalog numbers, and applications. WB = Western blot, IP =

5 immunoprecipitation, IF = immunofluorescence, and ChIP = chromatin immunoprecipitation.

6

7

|           |                       |
|-----------|-----------------------|
| siControl | GAGACCCUAUCCGUGAUUAGU |
| siCHIP #1 | UGCCGCCACUAUCUGUGUAAU |
| siCHIP #2 | AGGCCAAGCACGACAAGUA   |
| siSirT6   | AAGAAUGUGCCAAGUGUAAGA |

10

- 11 List of siRNA sequences used. A corresponding antisense strand was made and oligos were  
 12 annealed prior to transfection.

13

| Gene   | Sense                   | Antisense               |
|--------|-------------------------|-------------------------|
| BIRC3  | CCACGAGCAATGAAGCAAATGTC | GGGGA ACTCCAGCGGTAATAAC |
| ICAM   | ACGTGGTGGATGTCGAGTCTT   | ACTAAATATGAGCGGGTGTTC   |
| LDHB   | TCCGCAGGACTGTTACAGAG    | CGGATGCTCAGAGCTAAAGG    |
| NFKBIA | GCAGCCCCCTAACCACAGT     | CTGGGCGTAGGGATTTGCT     |
| PFKM   | TACTGCACAGGCACCGATAA    | CCCTCCTGCTCAGGTTATGA    |
| SOD2   | AGGTCGGCTTACTTGCAAAGC   | CGCCCTCCAACCCGTAT       |

17

- 18 List of primer sequences amplifying the promoter regions of the indicated human genes from  
 19 DNA obtained from ChIP assays. Assays were performed with SYBR green reagent.

20

| Table 4: mRNA primers |        |                       |                        |       |
|-----------------------|--------|-----------------------|------------------------|-------|
| Accession             | Gene   | Sense                 | Antisense              | Probe |
| <i>Mouse:</i>         |        |                       |                        |       |
| NM_007464.3           | Birc3  | TCGATGCAGAAGACGAGATG  | TTTGTTCTTCCGGATTAGTGC  | 68    |
| NM_019719.3           | Chip   | CTCAAGGAGCAGGGAAACC   | CACAAGTGGGTCCGAGTG     | 93    |
| NM_010493.2           | Icam1  | CCCACGCTACCTCTGCTC    | GATGGATACCTGAGCATCACC  | 81    |
| NM_008492.2           | Ldhd   | ACAAGTGGGTATGGCATGTG  | ACATCCACCAGGGCAAGTT    | 106   |
| NM_010907.2           | Nfkb1a | ACGAGCAAATGGTGAAGGAG  | ATGATTGCCAAGTGCAGGA    | 38    |
| NM_001163487.1        | Pfkm   | GGACAATCTGCAAGAAAGCAG | ATGATGCTCTTCATGGGTCA   | 91    |
| NM_181586.3           | Sirt6  | GACCTGATGCTCGCTGATG   | GGTACCCAGGGTGACAGACA   | 18    |
| NM_013671.3           | Sod2   | GACCCATTGCAAGGAACAA   | GTAGTAAGCGTGCTCCCACAC  | 3     |
| <i>Human:</i>         |        |                       |                        |       |
| NM_001165.4           | BIRC3  | CTTGTCTTGCTGGTGCAT    | AAGAAGTCGTTTTCTCCTTTGT | 62    |
| NM_005861             | CHIP   | GTTCGTGGGCCGAAAGTA    | GGCCCGTTGGTGTAAATA     | 49    |
| NM_000201             | ICAM1  | CCTTCCTCACCGTGTACTGG  | AGCGTAGGGTAAGGTTCTTGC  | 71    |
| NM_002300.6           | LDHB   | GATGGATTTTGGGGGAACAT  | CTGCCACATTCACACCACTC   | 5     |
| NM_020529             | NFKB1A | GTCAAGGAGCTGCAGGAGAT  | ATGGCCAAGTGCAGGAAC     | 38    |
| NM_001166686.1        | PFKM   | GCCATCAGCCTTTGACAGA   | CTCCAAAAGTGCCATCACTG   | 18    |
| NM_016539.2           | SIRT6  | AGCTGAGGGACACCATCCTA  | ATGTACCCAGCGTGATGGAC   | 18    |
| NM_000636.2           | SOD2   | CTGGACAAACCTCAGCCCTA  | TGATGGCTTCCAGCAACTC    | 22    |
| X03205.1              | 18S    | GCAATTATCCCCATGAACG   | GGGACTTAATCAACGCAAGC   | 48    |

21  
22 List of qPCR primer sequences amplifying cDNA for the indicated mouse and human genes with  
23 the corresponding probe from the Roche Universal Probe Library indicated. Assays were  
24 performed with Taqman reagent.

25  
26  
27 *Immunofluorescence:* Cells were fixed in 4% paraformaldehyde for 10 min, then incubated in  
28 permeabilization buffer (PBS, 0.5% Triton X-100, 1% BSA) for 10 min. Primary and secondary  
29 antibodies were prepared at 1:500 and 1:800 dilutions, respectively, in blocking buffer (PBS,  
30 0.05% Triton X-100, 1% BSA). Coverslips were mounted using Fluoro-Gel II with DAPI  
31 (Electron Microscopy Services). Cells were visualized using a Zeiss LSM 710 spectral confocal

32 microscope with a 63X oil immersion lens and Zeiss ZEN software package.  $\gamma$ H2AX foci larger  
33 than 10 pixels were quantified using ImageJ.

34

35 *SirT6 Half-Life* – shControl or shCHIP 293 cells stably expressing FLAG-SirT6  
36 (shControl+FLAG-SirT6 or shCHIP+FLAG-SirT6), or shControl or shCHIP 293 cells  
37 transfected for 24 h with FLAG-K170R SirT6, were split into 4 6-cm plates per cell type. After  
38 PBS wash, cells were incubated in depletion media (methionine/cysteine-free DMEM (Gibco),  
39 10% dialyzed FBS) for 30 min, then incubated for 30 min in depletion media containing 0.2 mCi  
40  $^{35}$ S methionine/cysteine (EasyTag Express Protein Labeling Mix, Perkin Elmer) per plate. Cells  
41 were rinsed three times with PBS, then incubated in chase media (DMEM, 10% FBS, 5 mM  
42 methionine, 5 mM cysteine). The cells used for 72-h timepoint samples were transferred into  
43 larger plates to prevent overconfluence after 48 h. At the indicated time points, cells were  
44 harvested on ice and pellets were stored at -80°C. Pellets were resuspended in lysis buffer,  
45 immunoprecipitations were performed as described in the manuscript, and bound protein was  
46 eluted using FLAG peptide. Lysates were separated on a NuPage 4-12% Bis-Tris gel, which was  
47 incubated in gel fixing solution (20% methanol, 10% acetic acid, 3% glycerol) for 15 min, dried  
48 on Whatman paper, and exposed in a dark cassette for 48 h on Blue Devil Autoradiography film  
49 (Genesee Scientific) prior to developing. For steady-state SirT6 protein level measurements,  
50 cells were incubated with actinomycin (1  $\mu$ g/mL), chloroquine (5  $\mu$ g/mL), cycloheximide (50  
51  $\mu$ g/mL), MG132 (2  $\mu$ g/mL), or ammonium chloride (1 mg/mL) for 16 h prior to harvesting.

52

53 *Chromatin immunoprecipitation:* Following crosslinking with 1% formaldehyde, cells were  
54 sonicated with a Misonix XL2010 sonicator. Soluble nuclear material from approximately 2

55 million cells was used per immunoprecipitation. ChIP was performed using Magna ChIP Protein  
56 A+G Magnetic Beads (Millipore) and the indicated antibodies in Table 1. Eluted DNA was  
57 isolated using the PCR Purification Kit (Qiagen). Real time PCR was performed on DNA  
58 samples using Sso Advanced SYBR Green Supermix (Bio-Rad) and validated primers  
59 amplifying the promoter regions of the indicated genes (Integrated DNA Technologies, see Table  
60 3) on a Roche LightCycler 480 real-time PCR instrument. Results were expressed relative to 1%  
61 input control and normalized to shControl samples.

62

63 *ChIP-seq*: Chromatin immunoprecipitation was performed as described, except the procedure  
64 was scaled up to accommodate approximately 60 million cells per immunoprecipitation. Library  
65 preparation was performed using NEB enzymes. End repair was performed with T4 DNA  
66 polymerase, T4 PNK, and Klenow polymerase for 30 min at 20°C. Adenosine bases were added  
67 using Klenow 3'-5' exonuclease for 30 min at 37°C. Paired-end adapters (Illumina) were ligated  
68 using Quick DNA ligase for 25 min at 20°C. DNA was purified using Agencourt AMPure XP  
69 beads. DNA was amplified in a PCR using Phusion polymerase (Finnzymes), and 200-400 bp  
70 chromatin fragments were gel-purified in a low-melt 2% agarose gel (Bio-Rad). Paired-end  
71 sequencing was performed on a Genome Analyzer II (Illumina) at the High Throughput  
72 Sequencing Facility at UNC-Chapel Hill. Data was processed using the Illumina pipeline, and  
73 raw data was aligned to the genome using Bowtie ([http://bowtie-](http://bowtie-bio.sourceforge.net/index.shtml)  
74 [bio.sourceforge.net/index.shtml](http://bowtie-bio.sourceforge.net/index.shtml)). SICER was used for peak calling, with a window size of 200  
75 bp. A list of exons, introns, and 5'/3' regions within 20K bp of genes from the UCSC Known  
76 Gene data set was generated, and peaks were assigned to features overlapping the peak area.  
77 Peaks with a *p* value greater than 0.05 were excluded from analysis. Annotated peak information

78 was analyzed using Ingenuity Pathway Analysis ([www.ingenuity.com](http://www.ingenuity.com)) and GATHER  
79 ([gather.genome.duke.edu](http://gather.genome.duke.edu)).
